# Supplementary material for: Scale Dependency of Arboreal Mammals’ Responses to Landscape Spatial Changes in a Fragmented Rainforest
Source: Research Square preprint supplement (doi:10.21203/rs.3.rs-993420/v1), 2021-10-25
Supplement: Supplementary file 1 [file 6f183d614a602195165ae8d9.docx]

**Supplementary material for:**

*Cudney-Valenzuela et al. Scale dependency of arboreal mammals’ responses to landscape spatial changes in a fragmented rainforest. Landscape Ecology*

**Table S1**. Species-specific body mass range. All weights were obtained from Ceballos and Oliva (2006)a

| Common name | Species | Weight (g) |
| --- | --- | --- |
| Black howler monkey | *Alouatta pigra* | 5500 - 8000 |
| Geoffroy’s Spider monkey | *Ateles geoffroyi* | 5740 - 6880 |
| Northern tamandua | *Tamandua mexicana* | 3200 - 7000 |
| White-nosed coati | *Nasua narica* | 4000 - 6000 |
| Kinkajou | *Potos flavus* | 1400 - 4600 |
| Mexican hairy dwarf porcupine | *Coendou mexicanus* | 1500 - 3000 |
| Common opossum | *Didelphis marsupialis* | 565 - 1610 |
| Gray squirrel | *Sciurus aureogaster* | 432 - 690 |
| Gray four-eyed opossum | *Philander opossum* | 300 - 600 |
| Wooly opossum | *Caluromys derbianus* | 245 - 370 |
| Deppe’s squirrel | *Sciurus deppei* | 200 - 300 |
| Mexican mouse opossum | *Marmosa mexicana* | 29 - 92 |

aCeballos G, Oliva G (2006) Los mamíferos silvestres de México. Comisión Nacional para el Conocimiento y Uso de la Biodiversidad. Fondo de Cultura Económica. Ciudad de México, México.

**Table S2**. Percentage of explained deviance and SoE of each mammal-landscape association for each landscape variable. AIC = Akaike Information Criterion. AIC null = AIC value of the null model. Models with a ΔAIC > 2 with the null model are marked in bold.

| **Species** | **Landscape metric** | **Scale of Efect** | **Explained deviance (%)** | **AIC** | **AIC null** |
| --- | --- | --- | --- | --- | --- |
| *Alouatta pigra* | Forest Cover | 1100 | 28.8 | **85.42** | 96.62 |
|  | Matrix Openness | 200 | 2.33 | 97.55 |  |
|  | Patch Density | 600 | 0.95 | 98.18 |  |
|  | Edge Density | 1200 | 8.01 | **94.48** |  |
| *Ateles geoffroyi* | Forest Cover | 500 | 13.68 | **82.08** | 87.97 |
|  | Matrix Openness | 1300 | 3.88 | 87.73 |  |
|  | Patch Density | 1000 | 30.45 | **72.42** |  |
|  | Edge Density | 1300 | 42.43 | **65.52** |  |
| *Caluromys derbianus* | Forest Cover | 600 | 12.99 | 79.81 | 80.9 |
|  | Matrix Openness | 1300 | 6.14 | 81.44 |  |
|  | Patch Density | 200 | 46.45 | **72.18** |  |
|  | Edge Density | 200 | 15.21 | **78.1** |  |
| *Coendou mexicanus* | Forest Cover | 200 | 4.84 | 61.29 | 60.64 |
|  | Matrix Openness | 400 | 16.74 | **57.97** |  |
|  | Patch Density | 300 | 9.91 | 59.87 |  |
|  | Edge Density | 1300 | 16.91 | **57.92** |  |
| *Didelphis marsupialis* | Forest Cover | 400 | 1.44 | 58.66 | 56.79 |
|  | Matrix Openness | 300 | 10.13 | 57.89 |  |
|  | Patch Density | 1000 | 18.21 | 57.17 |  |
|  | Edge Density | 1000 | 34.35 | 55.74 |  |
| *Marmosa mexicana* | Forest Cover | 200 | 1.52 | 67.9 | 66.18 |
|  | Matrix Openness | 200 | 6.82 | 66.93 |  |
|  | Patch Density | 200 | 4.01 | 67.45 |  |
|  | Edge Density | 1300 | 11.58 | 66.07 |  |
| *Nasua narica* | Forest Cover | 200 | 2.22 | 54.25 | 52.85 |
|  | Matrix Openness | 400 | 4.8 | 53.56 |  |
|  | Patch Density | 300 | 7.32 | 52.87 |  |
|  | Edge Density | 200 | 5.63 | 53.33 |  |
| *Philander opossum* | Forest Cover | 200 | 14.78 | **68.16** | 72.08 |
|  | Matrix Openness | 1300 | 3.52 | 72.67 |  |
|  | Patch Density | 1000 | 22.6 | **65.02** |  |
|  | Edge Density | 1300 | 32.12 | **61.22** |  |
| *Potos flavus* | Forest Cover | 400 | 41.8 | **82.31** | 89.93 |
|  | Matrix Openness | 500 | 19.93 | **87.34** |  |
|  | Patch Density | 400 | 28.79 | **85.3** |  |
|  | Edge Density | 400 | 28.79 | **85.48** |  |
| *Sciurus aureogaster* | Forest Cover | 700 | 32.79 | **57.62** | 60.77 |
|  | Matrix Openness | 1000 | 2.53 | 62.37 |  |
|  | Patch Density | 200 | 26.26 | **58.65** |  |
|  | Edge Density | 200 | 15.6 | 60.32 |  |
| *Sciurus deppei* | Forest Cover | 700 | 5.52 | 108.39 | 108.67 |
|  | Matrix Openness | 700 | 20.82 | **102.06** |  |
|  | Patch Density | 400 | 2.73 | 109.54 |  |
|  | Edge Density | 400 | 3.87 | 109.07 |  |
| *Tamandua mexicana* | Forest Cover | 500 | 50.32 | **40.72** | 45.68 |
|  | Matrix Openness | 600 | 16.47 | 45.4 |  |
|  | Patch Density | 600 | 23.56 | 44.42 |  |
|  | Edge Density | 300 | 19.56 | 44.98 |  |

**
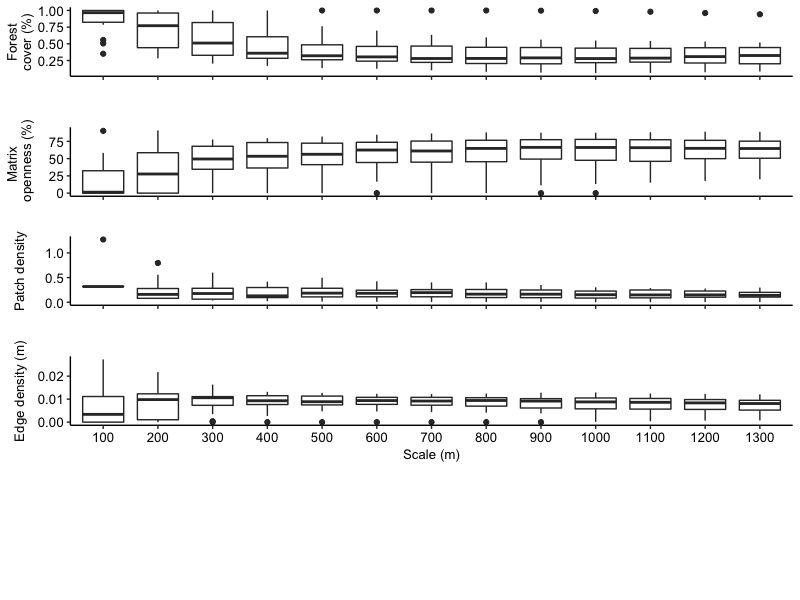
**

**Fig. S1**. Spatial configuration of study landscapes considering 13 concentric buffers (range = 100 – 1300 m radius) surrounding 20 forest patches in the Lacandona rainforest, Mexico.
